# Supplementary material
Source: PubMed Central journal article supplement (PMC3752755)
Supplement: SD1.pdf [file SD1.pdf]

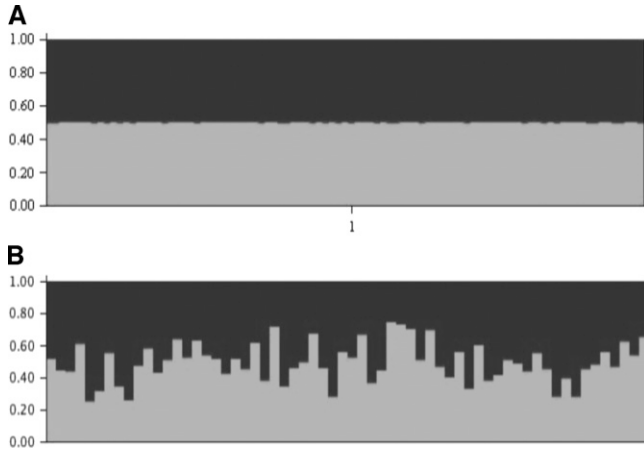

SUPPLEMENTAL FIGURE 1. Bayesian cluster analysis using STRUCTURE version 2.3.2 showing genetic membership of 93 and 62 mosquitoes representing **A**, Ukomba *Aopheles gambiae* M molecular forms, and **B**, Yengue *An. gambiae* S molecular forms, respectively, in continental Equatorial Guinea. The X-axis indicates assignment for each individual (**bars**) in the sample to genetic clusters (K), and the Y-axis indicates probability of assignment of an individual to a given genetic cluster. To determine the most likely number of clusters (K), we conducted five independent runs for each K = 1–5. For all runs, an admixture model and independent allele frequencies were assumed. Burn-in was 100,000 iterations, followed by 500,000 replications. The most likely number of clusters was determined according to the guidelines of Pritchard and others<sup>47</sup> for the calculation of  $\Delta K$ .

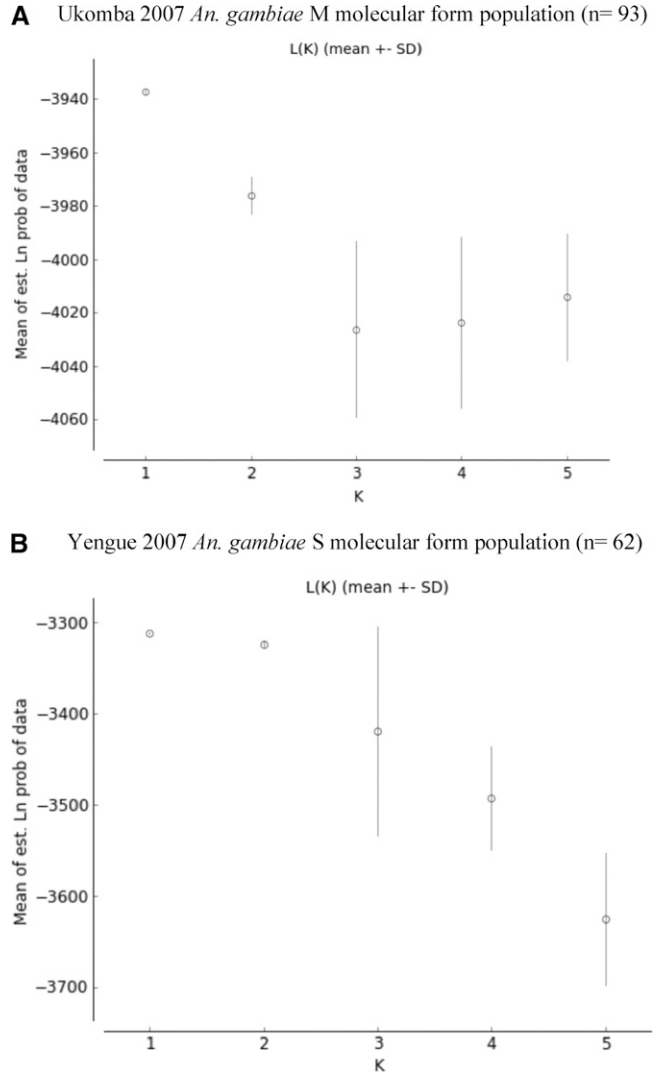

SUPPLEMENTAL FIGURE 2. Ln probabilities of the data for K = 1–5, indicating the highest probability of K = 1 in Ukomba (**A**) and Yengue (**B**) in continental Equatorial Guinea. Error bars indicate SE.

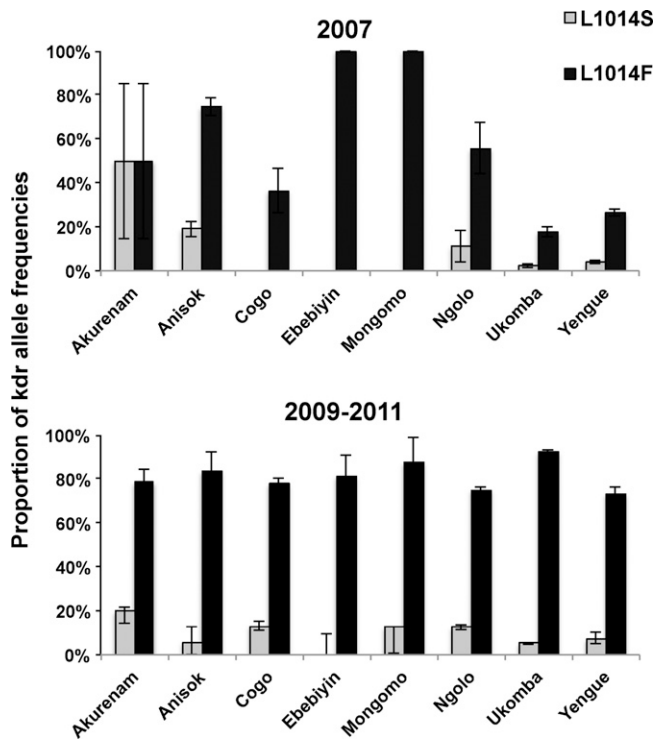

SUPPLEMENTAL FIGURE 3. Proportion of L1014S and L1014F allele frequencies for 2007 (pre-intervention) and post-intervention (2009–2011) for *Anopheles gambiae* M molecular form populations in continental Equatorial Guinea. Error bars indicate SE of the proportion.

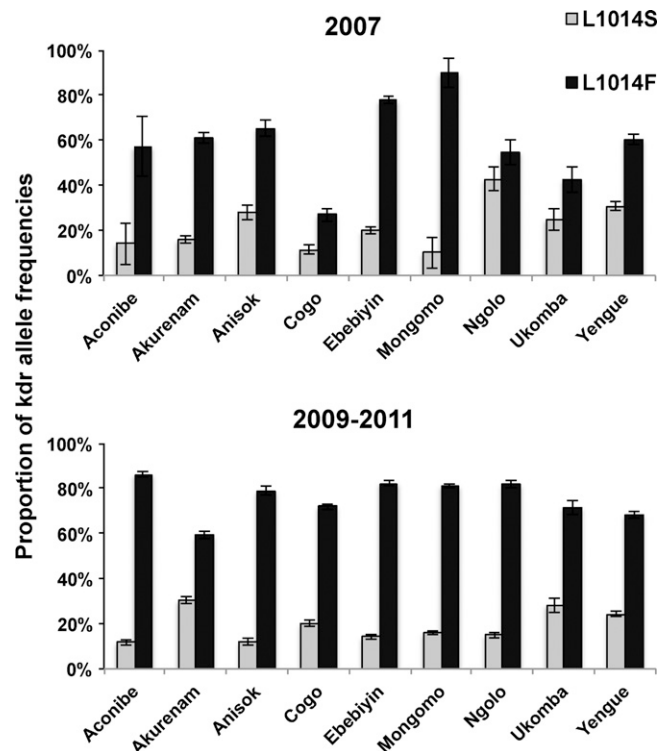

SUPPLEMENTAL FIGURE 4. Proportion of L1014S and L1014F allele frequencies for 2007 (pre-intervention) and 2009–2011 (post-intervention) *Anopheles gambiae* S molecular form populations in continental Equatorial Guinea. Error bars indicate SE of the proportion.

SUPPLEMENTAL TABLE 1

Z and P values of significance tests for differences between *kdr* allele frequencies between years in continental Equatorial Guinea\*

| Site     | L1014L  |                 | L1014S  |                 | L1014F   |                 |
|----------|---------|-----------------|---------|-----------------|----------|-----------------|
|          | Z       | P               | Z       | P               | Z        | P               |
| Anisok   | -0.7516 | 0.4523          | 1.4051  | 0.1600          | -0.8049  | 0.4209          |
| Cogo     | 7.3648  | < <b>0.0001</b> | -1.8181 | 0.0690          | -4.3071  | < <b>0.0001</b> |
| Ngolo    | 2.6298  | <b>0.0085</b>   | -0.1901 | 0.8492          | -1.8619  | 0.0626          |
| Ukomba   | 28.2030 | < <b>0.0001</b> | -2.2569 | <b>0.0240</b>   | -25.2319 | < <b>0.0001</b> |
| Yengue   | 11.6483 | < <b>0.0001</b> | -1.6424 | 0.1005          | -11.2002 | < <b>0.0001</b> |
| Aconibe  | 6.4567  | < <b>0.0001</b> | 0.2992  | 0.7648          | -3.0954  | <b>0.0020</b>   |
| Akurenam | 6.5228  | < <b>0.0001</b> | -5.9109 | < <b>0.0001</b> | 0.6982   | 0.4851          |
| Anisok   | -0.8530 | 0.3937          | 4.7279  | < <b>0.0001</b> | -3.5486  | <b>0.0004</b>   |
| Cogo     | 19.1330 | < <b>0.0001</b> | -2.9418 | <b>0.0033</b>   | -12.6166 | < <b>0.0001</b> |
| Ebebiyin | -1.2522 | 0.2105          | 3.4558  | <b>0.0005</b>   | -2.6118  | <b>0.0090</b>   |
| Mongomo  | -0.7562 | 0.4495          | -0.7189 | 0.4722          | 0.9945   | 0.3200          |
| Ngolo    | -0.3547 | 0.7228          | 6.2902  | < <b>0.0001</b> | -5.7593  | < <b>0.0001</b> |
| Ukomba   | 8.4200  | < <b>0.0001</b> | -0.5588 | 0.5763          | -4.5729  | < <b>0.0001</b> |
| Yengue   | 1.0097  | 0.3126          | 2.4116  | <b>0.0159</b>   | -2.8098  | <b>0.0050</b>   |

\**kdr* = knockdown resistance. Significant P values are indicated in bold.

SUPPLEMENTAL TABLE 2

Frequency of alleles at 16 microsatellite loci in three sites in continental Equatorial Guinea (Yengue, Ukomba, and Mongomo), 2007 and 2010

| Locus | Allele | Ukomba 2007 | Ukomba 2010 | Frequency change | Mongomo 2007 | Mongomo 2010 | Frequency change | Yengue 2007 | Yengue 2010 | Frequency change |
|-------|--------|-------------|-------------|------------------|--------------|--------------|------------------|-------------|-------------|------------------|
| 59    | No.    | 81          | 71          |                  | 53           | 83           |                  | 54          | 32          |                  |
|       | 106    | 0.019       | 0.000       | 0.019            |              |              |                  | 0.019       | 0.000       | 0.019            |
|       | 108    |             |             |                  |              |              |                  | 0.009       | 0.000       | 0.009            |
|       | 110    | 0.012       | 0.085       | -0.072           | 0.104        | 0.024        | 0.080            | 0.028       | 0.031       | -0.003           |
|       | 112    | 0.019       | 0.000       | 0.019            | 0.009        | 0.012        | -0.003           | 0.046       | 0.031       | 0.015            |
|       | 114    | 0.006       | 0.000       | 0.006            |              |              |                  | 0.093       | 0.016       | 0.077            |
|       | 116    | 0.037       | 0.000       | 0.037            | 0.000        | 0.030        | -0.030           | 0.065       | 0.000       | 0.065            |
|       | 118    | 0.062       | 0.183       | -0.121           | 0.160        | 0.283        | -0.123           | 0.259       | 0.313       | -0.053           |
|       | 120    | 0.130       | 0.063       | 0.066            | 0.151        | 0.157        | -0.006           | 0.083       | 0.063       | 0.021            |
|       | 122    | 0.105       | 0.472       | -0.367           | 0.208        | 0.205        | 0.003            | 0.120       | 0.172       | -0.052           |
|       | 124    | 0.056       | 0.148       | -0.092           | 0.170        | 0.193        | -0.023           | 0.111       | 0.250       | -0.139           |
|       | 126    | 0.173       | 0.028       | 0.145            | 0.142        | 0.036        | 0.105            | 0.037       | 0.031       | 0.006            |
|       | 128    | 0.265       | 0.014       | 0.251            | 0.038        | 0.054        | -0.016           | 0.037       | 0.063       | -0.025           |
|       | 130    | 0.056       | 0.007       | 0.049            | 0.009        | 0.000        | 0.009            | 0.019       | 0.000       | 0.019            |
|       | 132    | 0.043       | 0.000       | 0.043            |              |              |                  | 0.019       | 0.000       | 0.019            |
|       | 134    | 0.006       | 0.000       | 0.006            | 0.009        | 0.006        | 0.003            |             |             |                  |
|       | 136    |             |             |                  |              |              |                  | 0.000       | 0.016       | -0.016           |
|       | 138    | 0.012       | 0.000       | 0.012            |              |              |                  |             |             |                  |
|       | 162    |             |             |                  |              |              |                  | 0.009       | 0.000       | 0.009            |
|       | 170    |             |             |                  |              |              |                  | 0.009       | 0.000       | 0.009            |
|       | 174    |             |             |                  |              |              |                  | 0.009       | 0.000       | 0.009            |
|       | 182    |             |             |                  |              |              |                  | 0.009       | 0.016       | -0.006           |
|       | 266    |             |             |                  |              |              |                  | 0.009       | 0.000       | 0.009            |
| 288   |        |             |             |                  |              |              | 0.009            | 0.000       | 0.009       |                  |
| 93    | No.    | 79          | 71          |                  | 36           | 83           |                  | 51          | 24          |                  |
|       | 139    | 0.006       | 0.000       | 0.006            |              |              |                  | 0.020       | 0.063       | -0.043           |
|       | 141    | 0.006       | 0.042       | -0.036           |              |              |                  |             |             |                  |
|       | 142    |             |             |                  | 0.028        | 0.012        | 0.016            | 0.029       | 0.000       | 0.029            |
|       | 143    |             |             |                  | 0.042        | 0.000        | 0.042            | 0.000       | 0.042       | -0.042           |
|       | 145    | 0.025       | 0.000       | 0.025            | 0.042        | 0.102        | -0.061           | 0.039       | 0.000       | 0.039            |
|       | 147    | 0.051       | 0.021       | 0.030            | 0.111        | 0.078        | 0.033            | 0.039       | 0.083       | -0.044           |
|       | 149    | 0.386       | 0.430       | -0.044           | 0.264        | 0.392        | -0.128           | 0.216       | 0.333       | -0.118           |
|       | 151    | 0.266       | 0.317       | -0.051           | 0.222        | 0.211        | 0.011            | 0.235       | 0.146       | 0.089            |
|       | 153    | 0.082       | 0.063       | 0.019            | 0.153        | 0.042        | 0.111            | 0.059       | 0.042       | 0.017            |
|       | 155    | 0.038       | 0.063       | -0.025           | 0.014        | 0.030        | -0.016           | 0.049       | 0.083       | -0.034           |
|       | 157    | 0.038       | 0.000       | 0.038            | 0.014        | 0.018        | -0.004           | 0.049       | 0.021       | 0.028            |
|       | 159    | 0.019       | 0.000       | 0.019            | 0.056        | 0.066        | -0.011           | 0.088       | 0.063       | 0.026            |
|       | 161    | 0.006       | 0.000       | 0.006            | 0.000        | 0.006        | -0.006           | 0.010       | 0.000       | 0.010            |
|       | 165    |             |             |                  | 0.000        | 0.012        | -0.012           |             |             |                  |
|       | 169    |             |             |                  |              |              |                  | 0.010       | 0.000       | 0.010            |
|       | 171    |             |             |                  | 0.014        | 0.000        | 0.014            |             |             |                  |
|       | 173    |             |             |                  | 0.014        | 0.000        | 0.014            | 0.000       | 0.021       | -0.021           |
|       | 174    |             |             |                  |              |              |                  | 0.010       | 0.000       | 0.010            |
|       | 176    |             |             |                  | 0.000        | 0.006        | -0.006           | 0.029       | 0.042       | -0.012           |
|       | 177    | 0.013       | 0.007       | 0.006            |              |              |                  |             |             |                  |
|       | 178    | 0.000       | 0.007       | -0.007           | 0.000        | 0.006        | -0.006           | 0.010       | 0.000       | 0.010            |
|       | 179    | 0.006       | 0.049       | -0.043           |              |              |                  |             |             |                  |
| 180   |        |             |             |                  |              |              | 0.010            | 0.000       | 0.010       |                  |
| 181   |        |             |             |                  |              |              | 0.000            | 0.021       | -0.021      |                  |
| 183   | 0.044  | 0.000       | 0.044       | 0.014            | 0.012        | 0.002        | 0.029            | 0.000       | 0.029       |                  |
| 185   | 0.013  | 0.000       | 0.013       | 0.014            | 0.006        | 0.008        | 0.020            | 0.042       | -0.022      |                  |
| 191   |        |             |             |                  |              |              | 0.010            | 0.000       | 0.010       |                  |
| 229   |        |             |             |                  |              |              | 0.029            | 0.000       | 0.029       |                  |
| 234   |        |             |             |                  |              |              | 0.010            | 0.000       | 0.010       |                  |
| 119   | No.    | 93          | 71          |                  | 0            | 0            |                  | 58          | 32          |                  |
|       | 177    | 0.005       | 0.007       | -0.002           |              |              |                  |             |             |                  |
|       | 179    | 0.016       | 0.028       | -0.012           |              |              |                  | 0.009       | 0.000       | 0.009            |
|       | 181    | 0.038       | 0.042       | -0.005           |              |              |                  | 0.138       | 0.094       | 0.044            |
|       | 183    | 0.065       | 0.077       | -0.013           |              |              |                  | 0.043       | 0.125       | -0.082           |
|       | 185    | 0.226       | 0.331       | -0.105           |              |              |                  | 0.216       | 0.203       | 0.012            |
|       | 187    | 0.210       | 0.296       | -0.086           |              |              |                  | 0.138       | 0.141       | -0.003           |
|       | 189    | 0.038       | 0.021       | 0.017            |              |              |                  | 0.060       | 0.063       | -0.002           |
|       | 191    | 0.086       | 0.070       | 0.016            |              |              |                  | 0.103       | 0.094       | 0.010            |
|       | 193    | 0.070       | 0.049       | 0.021            |              |              |                  | 0.009       | 0.031       | -0.023           |
|       | 195    | 0.038       | 0.014       | 0.024            |              |              |                  | 0.121       | 0.125       | -0.004           |
|       | 197    | 0.081       | 0.063       | 0.017            |              |              |                  | 0.017       | 0.047       | -0.030           |
|       | 199    | 0.011       | 0.000       | 0.011            |              |              |                  | 0.017       | 0.000       | 0.017            |
|       | 201    | 0.016       | 0.000       | 0.016            |              |              |                  | 0.009       | 0.031       | -0.023           |
|       | 203    | 0.016       | 0.000       | 0.016            |              |              |                  | 0.043       | 0.031       | 0.012            |
| 205   | 0.022  | 0.000       | 0.022       |                  |              |              | 0.009            | 0.000       | 0.009       |                  |

(continued)

SUPPLEMENTAL TABLE 2  
Continued

| Locus | Allele | Ukomba 2007 | Ukomba 2010 | Frequency change | Mongomo 2007 | Mongomo 2010 | Frequency change | Yengue 2007 | Yengue 2010 | Frequency change |
|-------|--------|-------------|-------------|------------------|--------------|--------------|------------------|-------------|-------------|------------------|
|       | 209    | 0.000       | 0.000       | 0.000            |              |              |                  | 0.017       | 0.000       | 0.017            |
|       | 215    | 0.016       | 0.000       | 0.016            |              |              |                  | 0.009       | 0.000       | 0.009            |
|       | 217    | 0.011       | 0.000       | 0.011            |              |              |                  | 0.009       | 0.000       | 0.009            |
|       | 221    | 0.011       | 0.000       | 0.011            |              |              |                  |             |             |                  |
|       | 235    | 0.005       | 0.000       | 0.005            |              |              |                  |             |             |                  |
|       | 237    | 0.005       | 0.000       | 0.005            |              |              |                  |             |             |                  |
|       | 239    |             |             |                  |              |              |                  | 0.026       | 0.000       | 0.026            |
|       | 241    | 0.005       | 0.000       | 0.005            |              |              |                  |             |             |                  |
|       | 251    | 0.005       | 0.000       | 0.005            |              |              |                  |             |             |                  |
|       | 252    |             |             |                  |              |              |                  | 0.000       | 0.016       | -0.016           |
|       | 253    |             |             |                  |              |              |                  | 0.009       | 0.000       | 0.009            |
|       | 255    | 0.005       | 0.000       | 0.005            |              |              |                  |             |             |                  |
| 164   | 66     |             | 71          |                  | 53           | 81           |                  | 57          | 31          |                  |
|       | 81     | 0.030       | 0.085       | -0.054           | 0.028        | 0.062        | -0.033           | 0.053       | 0.081       | -0.028           |
|       | 83     | 0.061       | 0.063       | -0.003           | 0.000        | 0.012        | -0.012           |             |             |                  |
|       | 85     | 0.197       | 0.204       | -0.007           | 0.009        | 0.031        | -0.021           | 0.044       | 0.032       | 0.012            |
|       | 87     | 0.083       | 0.042       | 0.041            | 0.264        | 0.265        | -0.001           | 0.386       | 0.242       | 0.144            |
|       | 89     | 0.129       | 0.162       | -0.033           | 0.481        | 0.395        | 0.086            | 0.316       | 0.339       | -0.023           |
|       | 91     | 0.098       | 0.070       | 0.028            | 0.047        | 0.062        | -0.015           | 0.018       | 0.000       | 0.018            |
|       | 92     |             |             |                  |              |              |                  | 0.009       | 0.000       | 0.009            |
|       | 93     | 0.114       | 0.176       | -0.062           | 0.075        | 0.068        | 0.008            | 0.035       | 0.032       | 0.003            |
|       | 95     | 0.121       | 0.127       | -0.006           | 0.019        | 0.068        | -0.049           | 0.044       | 0.081       | -0.037           |
|       | 96     |             |             |                  | 0.028        | 0.000        | 0.028            | 0.026       | 0.065       | -0.038           |
|       | 97     | 0.015       | 0.000       | 0.015            |              |              |                  | 0.018       | 0.000       | 0.018            |
|       | 99     | 0.106       | 0.056       | 0.050            |              |              |                  |             |             |                  |
|       | 103    | 0.008       | 0.000       | 0.008            | 0.000        | 0.019        | -0.019           |             |             |                  |
|       | 105    | 0.030       | 0.014       | 0.016            |              |              |                  | 0.009       | 0.000       | 0.009            |
|       | 110    |             |             |                  | 0.000        | 0.019        | -0.019           | 0.000       | 0.000       | 0.000            |
|       | 111    | 0.008       | 0.000       | 0.008            | 0.019        | 0.000        | 0.019            | 0.009       | 0.000       | 0.009            |
|       | 113    |             |             |                  |              |              |                  | 0.009       | 0.000       | 0.009            |
|       | 114    |             |             |                  |              |              |                  | 0.000       | 0.016       | -0.016           |
|       | 116    |             |             |                  | 0.028        | 0.000        | 0.028            | 0.026       | 0.113       | -0.087           |
| 175   |        | 0           | 0           |                  | 53           | 80           |                  | 61          | 31          |                  |
|       | 80     |             |             |                  |              |              |                  | 0.041       | 0.081       | -0.040           |
|       | 85     |             |             |                  | 0.009        | 0.038        | -0.028           | 0.025       | 0.032       | -0.008           |
|       | 86     |             |             |                  | 0.000        | 0.250        | -0.250           |             |             |                  |
|       | 87     |             |             |                  | 0.283        | 0.025        | 0.258            | 0.377       | 0.242       | 0.135            |
|       | 89     |             |             |                  | 0.009        | 0.419        | -0.409           | 0.016       | 0.000       | 0.016            |
|       | 90     |             |             |                  | 0.462        | 0.000        | 0.462            | 0.328       | 0.339       | -0.011           |
|       | 91     |             |             |                  | 0.038        | 0.069        | -0.031           | 0.025       | 0.032       | -0.008           |
|       | 93     |             |             |                  | 0.047        | 0.069        | -0.022           | 0.016       | 0.000       | 0.016            |
|       | 94     |             |             |                  | 0.066        | 0.000        | 0.066            | 0.041       | 0.048       | -0.007           |
|       | 95     |             |             |                  | 0.000        | 0.069        | -0.069           | 0.008       | 0.032       | -0.024           |
|       | 97     |             |             |                  | 0.028        | 0.000        | 0.028            | 0.049       | 0.065       | -0.015           |
|       | 99     |             |             |                  |              |              |                  | 0.016       | 0.000       | 0.016            |
|       | 103    |             |             |                  | 0.000        | 0.013        | -0.013           |             |             |                  |
|       | 105    |             |             |                  |              |              |                  | 0.008       | 0.000       | 0.008            |
|       | 107    |             |             |                  |              |              |                  | 0.008       | 0.000       | 0.008            |
|       | 109    |             |             |                  | 0.000        | 0.044        | -0.044           |             |             |                  |
|       | 111    |             |             |                  | 0.019        | 0.000        | 0.019            | 0.016       | 0.000       | 0.016            |
|       | 114    |             |             |                  |              |              |                  | 0.000       | 0.016       | -0.016           |
|       | 115    |             |             |                  | 0.009        | 0.000        | 0.009            | 0.016       | 0.000       | 0.016            |
|       | 116    |             |             |                  | 0.009        | 0.000        | 0.009            | 0.008       | 0.113       | -0.105           |
|       | 135    |             |             |                  | 0.000        | 0.006        | -0.006           |             |             |                  |
|       | 137    |             |             |                  | 0.009        | 0.000        | 0.009            |             |             |                  |
|       | 139    |             |             |                  | 0.009        | 0.000        | 0.009            |             |             |                  |
| 242   | N      | 78          | 71          |                  | 0            | 0            |                  | 55          | 31          |                  |
|       | 55     | 0.295       | 0.000       | 0.295            |              |              |                  |             |             |                  |
|       | 57     | 0.141       | 0.310       | -0.169           |              |              |                  | 0.445       | 0.597       | -0.151           |
|       | 59     | 0.019       | 0.028       | -0.009           |              |              |                  | 0.018       | 0.032       | -0.014           |
|       | 61     | 0.301       | 0.035       | 0.266            |              |              |                  | 0.000       | 0.016       | -0.016           |
|       | 62     | 0.000       | 0.000       | 0.000            |              |              |                  | 0.009       | 0.016       | -0.007           |
|       | 63     | 0.032       | 0.394       | -0.362           |              |              |                  | 0.109       | 0.065       | 0.045            |
|       | 65     | 0.167       | 0.162       | 0.005            |              |              |                  | 0.109       | 0.177       | -0.068           |
|       | 67     | 0.019       | 0.056       | -0.037           |              |              |                  | 0.055       | 0.032       | 0.022            |
|       | 69     | 0.026       | 0.014       | 0.012            |              |              |                  | 0.045       | 0.000       | 0.045            |
|       | 71     |             |             |                  |              |              |                  | 0.000       | 0.016       | -0.016           |
|       | 75     |             |             |                  |              |              |                  | 0.027       | 0.000       | 0.027            |
|       | 79     |             |             |                  |              |              |                  | 0.000       | 0.048       | -0.048           |

(continued)

SUPPLEMENTAL TABLE 2  
Continued

| Locus | Allele | Ukomba 2007 | Ukomba 2010 | Frequency change | Mongomo 2007 | Mongomo 2010 | Frequency change | Yengue 2007 | Yengue 2010 | Frequency change |
|-------|--------|-------------|-------------|------------------|--------------|--------------|------------------|-------------|-------------|------------------|
|       | 83     |             |             |                  |              |              |                  | 0.100       | 0.000       | 0.100            |
|       | 89     |             |             |                  |              |              |                  | 0.027       | 0.000       | 0.027            |
|       | 93     |             |             |                  |              |              |                  | 0.018       | 0.000       | 0.018            |
|       | 105    |             |             |                  |              |              |                  | 0.036       | 0.000       | 0.036            |
| 249   |        | 64          | 76          |                  | 53           | 82           |                  | 60          | 32          |                  |
|       | 91     | 0.000       | 0.013       | -0.013           |              |              |                  |             |             |                  |
|       | 99     | 0.000       | 0.039       | -0.039           |              |              |                  |             |             |                  |
|       | 101    |             |             |                  | 0.009        | 0.000        | 0.009            | 0.025       | 0.047       | -0.022           |
|       | 103    | 0.000       | 0.007       | -0.007           |              |              |                  |             |             |                  |
|       | 105    | 0.008       | 0.000       | 0.008            | 0.000        | 0.030        | -0.030           | 0.000       | 0.063       | -0.063           |
|       | 107    | 0.055       | 0.026       | 0.028            | 0.066        | 0.061        | 0.005            | 0.075       | 0.016       | 0.059            |
|       | 109    | 0.281       | 0.224       | 0.058            | 0.292        | 0.311        | -0.019           | 0.225       | 0.188       | 0.038            |
|       | 111    | 0.109       | 0.072       | 0.037            | 0.236        | 0.159        | 0.077            | 0.292       | 0.172       | 0.120            |
|       | 113    | 0.141       | 0.138       | 0.002            | 0.113        | 0.207        | -0.094           | 0.142       | 0.234       | -0.093           |
|       | 115    | 0.219       | 0.257       | -0.038           | 0.170        | 0.073        | 0.097            | 0.083       | 0.109       | -0.026           |
|       | 117    | 0.008       | 0.007       | 0.001            | 0.047        | 0.085        | -0.038           | 0.092       | 0.094       | -0.002           |
|       | 119    | 0.125       | 0.145       | -0.020           | 0.000        | 0.024        | -0.024           | 0.017       | 0.000       | 0.017            |
|       | 121    | 0.023       | 0.046       | -0.023           |              |              |                  |             |             |                  |
|       | 122    |             |             |                  |              |              |                  | 0.008       | 0.016       | -0.007           |
|       | 123    |             |             |                  | 0.000        | 0.012        | -0.012           | 0.000       | 0.000       | 0.000            |
|       | 124    |             |             |                  | 0.009        | 0.000        | 0.009            | 0.000       | 0.016       | -0.016           |
|       | 126    |             |             |                  | 0.009        | 0.000        | 0.009            | 0.008       | 0.000       | 0.008            |
|       | 128    |             |             |                  | 0.028        | 0.012        | 0.016            |             |             |                  |
|       | 131    |             |             |                  | 0.009        | 0.006        | 0.003            | 0.008       | 0.016       | -0.007           |
|       | 133    | 0.008       | 0.000       | 0.008            | 0.009        | 0.012        | -0.003           | 0.008       | 0.031       | -0.023           |
|       | 137    |             |             |                  | 0.000        | 0.006        | -0.006           | 0.008       | 0.000       | 0.008            |
|       | 139    |             |             |                  |              |              |                  | 0.008       | 0.000       | 0.008            |
| 325   |        | 0.016       | 0.026       | -0.011           |              |              |                  | 56          | 30          |                  |
|       | 80     | 0           | 0           |                  | 0            | 0            |                  | 0.089       | 0.067       | 0.023            |
|       | 82     |             |             |                  |              |              |                  | 0.348       | 0.367       | -0.018           |
|       | 84     |             |             |                  |              |              |                  | 0.063       | 0.083       | -0.021           |
|       | 86     |             |             |                  |              |              |                  | 0.241       | 0.167       | 0.074            |
|       | 89     |             |             |                  |              |              |                  | 0.098       | 0.150       | -0.052           |
|       | 91     |             |             |                  |              |              |                  | 0.054       | 0.083       | -0.030           |
|       | 93     |             |             |                  |              |              |                  | 0.009       | 0.033       | -0.024           |
|       | 108    |             |             |                  |              |              |                  | 0.098       | 0.033       | 0.065            |
|       | 110    |             |             |                  |              |              |                  | 0.000       | 0.017       | -0.017           |
| 417   |        | 90          | 77          |                  | 52           | 82           |                  | 62          | 30          |                  |
|       | 67     |             |             |                  | 0.010        | 0.018        | -0.009           | 0.008       | 0.017       | -0.009           |
|       | 68     | 0.044       | 0.039       | 0.005            |              |              |                  |             |             |                  |
|       | 74     |             |             |                  | 0.000        | 0.018        | -0.018           |             |             |                  |
|       | 76     |             |             |                  | 0.000        | 0.006        | -0.006           |             |             |                  |
|       | 78     | 0.567       | 0.552       | 0.015            | 0.510        | 0.549        | -0.039           | 0.645       | 0.667       | -0.022           |
|       | 80     |             |             |                  | 0.000        | 0.018        | -0.018           | 0.000       | 0.000       | 0.000            |
|       | 82     | 0.217       | 0.227       | -0.011           | 0.250        | 0.128        | 0.122            | 0.153       | 0.100       | 0.053            |
|       | 84     | 0.072       | 0.110       | -0.038           | 0.231        | 0.238        | -0.007           | 0.185       | 0.217       | -0.031           |
|       | 88     | 0.100       | 0.071       | 0.029            | 0.000        | 0.006        | -0.006           | 0.008       | 0.000       | 0.008            |
|       | 90     |             |             |                  | 0.000        | 0.018        | -0.018           |             |             |                  |
| 555   |        | 88          | 70          |                  | 0            | 0            |                  | 61          | 32          |                  |
|       | 78     |             |             |                  |              |              |                  | 0.000       | 0.141       | -0.141           |
|       | 80     | 0.028       | 0.043       | -0.014           |              |              |                  | 0.000       | 0.016       | -0.016           |
|       | 82     | 0.443       | 0.536       | -0.093           |              |              |                  | 0.205       | 0.000       | 0.205            |
|       | 84     | 0.153       | 0.221       | -0.068           |              |              |                  | 0.008       | 0.000       | 0.008            |
|       | 86     | 0.034       | 0.021       | 0.013            |              |              |                  | 0.230       | 0.094       | 0.136            |
|       | 88     | 0.040       | 0.021       | 0.018            |              |              |                  | 0.156       | 0.000       | 0.156            |
|       | 90     | 0.085       | 0.064       | 0.021            |              |              |                  | 0.115       | 0.000       | 0.115            |
|       | 92     | 0.063       | 0.064       | -0.002           |              |              |                  | 0.148       | 0.063       | 0.085            |
|       | 94     | 0.006       | 0.029       | -0.023           |              |              |                  | 0.025       | 0.563       | -0.538           |
|       | 96     |             |             |                  |              |              |                  | 0.008       | 0.078       | -0.070           |
|       | 100    | 0.034       | 0.000       | 0.034            |              |              |                  | 0.000       | 0.016       | -0.016           |
|       | 102    | 0.006       | 0.000       | 0.006            |              |              |                  | 0.008       | 0.016       | -0.007           |
|       | 103    |             |             |                  |              |              |                  | 0.000       | 0.016       | -0.016           |
|       | 104    | 0.034       | 0.000       | 0.034            |              |              |                  | 0.016       | 0.000       | 0.016            |
|       | 106    | 0.040       | 0.000       | 0.040            |              |              |                  |             |             |                  |
|       | 108    | 0.017       | 0.000       | 0.017            |              |              |                  | 0.025       | 0.000       | 0.025            |
|       | 110    | 0.017       | 0.000       | 0.017            |              |              |                  | 0.025       | 0.000       | 0.025            |
|       | 112    |             |             |                  |              |              |                  | 0.016       | 0.000       | 0.016            |
|       | 120    |             |             |                  |              |              |                  | 0.016       | 0.000       | 0.016            |

(continued)

SUPPLEMENTAL TABLE 2  
Continued

| Locus | Allele | Ukomba 2007 | Ukomba 2010 | Frequency change | Mongomo 2007 | Mongomo 2010 | Frequency change | Yengue 2007 | Yengue 2010 | Frequency change |       |
|-------|--------|-------------|-------------|------------------|--------------|--------------|------------------|-------------|-------------|------------------|-------|
| 577   |        | 86          | 71          |                  | 49           | 83           |                  | 61          | 18          |                  |       |
|       | 76     | 0.017       | 0.021       | -0.004           |              |              |                  |             |             |                  |       |
|       | 78     | 0.140       | 0.169       | -0.029           | 0.122        | 0.036        | 0.086            | 0.197       | 0.000       | 0.197            |       |
|       | 80     | 0.012       | 0.000       | 0.012            | 0.061        | 0.018        | 0.043            | 0.008       | 0.000       | 0.008            |       |
|       | 82     | 0.006       | 0.000       | 0.006            | 0.000        | 0.289        | -0.289           | 0.000       | 0.306       | -0.306           |       |
|       | 84     | 0.000       | 0.007       | -0.007           | 0.000        | 0.078        | -0.078           |             |             |                  |       |
|       | 86     | 0.017       | 0.042       | -0.025           | 0.102        | 0.205        | -0.103           | 0.074       | 0.167       | -0.093           |       |
|       | 88     |             |             |                  | 0.000        | 0.175        | -0.175           | 0.000       | 0.111       | -0.111           |       |
|       | 90     | 0.029       | 0.007       | 0.022            | 0.000        | 0.157        | -0.157           | 0.000       | 0.222       | -0.222           |       |
|       | 92     |             |             |                  | 0.041        | 0.006        | 0.035            | 0.066       | 0.139       | -0.073           |       |
|       | 94     | 0.616       | 0.697       | -0.081           | 0.541        | 0.000        | 0.541            | 0.500       | 0.028       | 0.472            |       |
|       | 96     | 0.041       | 0.049       | -0.009           | 0.112        | 0.000        | 0.112            | 0.008       | 0.000       | 0.008            |       |
|       | 100    |             |             |                  | 0.010        | 0.000        | 0.010            |             |             |                  |       |
|       | 102    | 0.029       | 0.007       | 0.022            | 0.000        | 0.006        | -0.006           | 0.025       | 0.000       | 0.025            |       |
|       | 103    |             |             |                  |              |              |                  | 0.008       | 0.000       | 0.008            |       |
|       | 104    |             |             |                  | 0.010        | 0.006        | 0.004            |             |             |                  |       |
|       | 105    |             |             |                  |              |              |                  | 0.016       | 0.000       | 0.016            |       |
|       | 106    |             |             |                  | 0.000        | 0.006        | -0.006           |             |             |                  |       |
|       | 110    | 0.029       | 0.000       | 0.029            |              |              |                  |             |             |                  |       |
|       | 111    |             |             |                  |              |              |                  | 0.025       | 0.000       | 0.025            |       |
| 112   | 0.064  | 0.000       | 0.064       |                  |              |              |                  |             |             |                  |       |
| 113   |        |             |             |                  |              |              | 0.074            | 0.000       | 0.074       |                  |       |
| 118   |        |             |             | 0.000            | 0.012        | -0.012       |                  |             |             |                  |       |
| 120   |        |             |             |                  |              |              | 0.000            | 0.028       | -0.028      |                  |       |
| 128   |        |             |             | 0.000            | 0.006        | -0.006       |                  |             |             |                  |       |
| 603   |        | 92          | 76          |                  | 52           | 82           |                  | 50          | 32          |                  |       |
|       | 98     |             |             |                  | 0.000        | 0.012        | -0.012           |             |             |                  |       |
|       | 100    |             |             |                  | 0.010        | 0.037        | -0.027           | 0.020       | 0.016       | 0.004            |       |
|       | 102    |             |             |                  | 0.048        | 0.171        | -0.123           | 0.000       | 0.031       | -0.031           |       |
|       | 104    | 0.766       | 0.849       | -0.082           | 0.817        | 0.701        | 0.116            | 0.820       | 0.750       | 0.070            |       |
|       | 106    | 0.152       | 0.099       | 0.053            | 0.115        | 0.067        | 0.048            | 0.140       | 0.125       | 0.015            |       |
|       | 108    | 0.005       | 0.000       | 0.005            | 0.000        | 0.006        | -0.006           | 0.000       | 0.016       | -0.016           |       |
|       | 110    |             |             |                  | 0.010        | 0.006        | 0.004            | 0.020       | 0.047       | -0.027           |       |
|       | 114    |             |             |                  |              |              |                  | 0.000       | 0.016       | -0.016           |       |
|       | 128    | 0.005       | 0.026       | -0.021           |              |              |                  |             |             |                  |       |
|       | 130    | 0.005       | 0.007       | -0.001           |              |              |                  |             |             |                  |       |
|       | 140    | 0.016       | 0.000       | 0.016            |              |              |                  |             |             |                  |       |
|       | 144    | 0.043       | 0.013       | 0.030            |              |              |                  |             |             |                  |       |
|       | 146    | 0.005       | 0.007       | -0.001           |              |              |                  |             |             |                  |       |
|       | 720    |             | 92          | 74               |              | 53           | 83               |             | 52          | 32               |       |
|       |        | 61          | 0.114       | 0.108            | 0.006        | 0.198        | 0.151            | 0.048       | 0.279       | 0.203            | 0.076 |
| 63    |        | 0.342       | 0.331       | 0.011            | 0.142        | 0.145        | -0.003           | 0.048       | 0.141       | -0.093           |       |
| 65    |        | 0.250       | 0.270       | -0.020           | 0.330        | 0.380        | -0.049           | 0.298       | 0.266       | 0.032            |       |
| 67    |        | 0.179       | 0.155       | 0.024            | 0.245        | 0.223        | 0.022            | 0.250       | 0.266       | -0.016           |       |
| 69    |        | 0.038       | 0.014       | 0.025            | 0.066        | 0.066        | 0.000            | 0.058       | 0.063       | -0.005           |       |
| 71    |        | 0.071       | 0.088       | -0.017           | 0.009        | 0.024        | -0.015           | 0.038       | 0.047       | -0.008           |       |
| 73    |        | 0.005       | 0.034       | -0.028           | 0.009        | 0.012        | -0.003           | 0.010       | 0.016       | -0.006           |       |
| 77    |        |             |             |                  |              |              |                  | 0.019       | 0.000       | 0.019            |       |
| 770   |        |             | 89          | 77               |              | 50           | 81               |             | 62          | 30               |       |
| 153   | 0.022  | 0.026       | -0.004      | 0.070            | 0.074        | -0.004       |                  |             |             |                  |       |
| 155   | 0.455  | 0.422       | 0.033       | 0.070            | 0.012        | 0.058        | 0.137            | 0.083       | 0.054       |                  |       |
| 157   | 0.135  | 0.195       | -0.060      | 0.010            | 0.049        | -0.039       | 0.008            | 0.083       | -0.075      |                  |       |
| 159   | 0.017  | 0.006       | 0.010       | 0.030            | 0.043        | -0.013       | 0.097            | 0.083       | 0.013       |                  |       |
| 160   |        |             |             | 0.000            | 0.031        | -0.031       |                  |             |             |                  |       |
| 161   | 0.247  | 0.208       | 0.039       | 0.080            | 0.080        | 0.000        | 0.113            | 0.167       | -0.054      |                  |       |
| 163   | 0.011  | 0.000       | 0.011       | 0.070            | 0.105        | -0.035       | 0.202            | 0.117       | 0.085       |                  |       |
| 165   | 0.011  | 0.006       | 0.005       | 0.040            | 0.025        | 0.015        | 0.024            | 0.033       | -0.009      |                  |       |
| 167   | 0.079  | 0.117       | -0.038      | 0.080            | 0.383        | -0.303       | 0.073            | 0.017       | 0.056       |                  |       |
| 169   |        |             |             | 0.380            | 0.198        | 0.182        | 0.169            | 0.200       | -0.031      |                  |       |
| 171   | 0.022  | 0.019       | 0.003       | 0.170            | 0.000        | 0.170        | 0.177            | 0.217       | -0.039      |                  |       |
| 787   |        | 85          | 77          |                  | 52           | 83           |                  | 62          | 31          |                  |       |
|       | 104    |             |             |                  |              |              |                  | 0.000       | 0.016       | -0.016           |       |
|       | 106    |             |             |                  | 0.000        | 0.012        | -0.012           |             |             |                  |       |
|       | 108    | 0.159       | 0.175       | -0.017           | 0.000        | 0.030        | -0.030           |             |             |                  |       |
|       | 110    | 0.071       | 0.104       | -0.033           | 0.038        | 0.042        | -0.004           | 0.000       | 0.032       | -0.032           |       |
|       | 112    | 0.612       | 0.591       | 0.021            | 0.538        | 0.602        | -0.064           | 0.621       | 0.613       | 0.008            |       |
|       | 114    | 0.147       | 0.130       | 0.017            | 0.385        | 0.271        | 0.114            | 0.315       | 0.306       | 0.008            |       |
|       | 116    | 0.012       | 0.000       | 0.012            | 0.010        | 0.012        | -0.002           | 0.008       | 0.000       | 0.008            |       |
|       | 118    |             |             |                  | 0.019        | 0.024        | -0.005           | 0.024       | 0.016       | 0.008            |       |
|       | 120    |             |             |                  | 0.000        | 0.006        | -0.006           |             |             |                  |       |

(continued)

SUPPLEMENTAL TABLE 2  
Continued

| Locus | Allele | Ukomba 2007 | Ukomba 2010    | Frequency change | Mongomo 2007 | Mongomo 2010   | Frequency change | Yengue 2007 | Yengue 2010    | Frequency change |
|-------|--------|-------------|----------------|------------------|--------------|----------------|------------------|-------------|----------------|------------------|
|       | 122    |             |                |                  | 0.010        | 0.000          | 0.010            |             |                |                  |
|       | 123    |             |                |                  |              |                |                  | 0.008       | 0.000          | 0.008            |
|       | 125    |             |                |                  |              |                |                  | 0.016       | 0.000          | 0.016            |
| 817   | 127    | 76          | 77             |                  | 50           | 83             |                  | 0.008       | 0.016          | -0.008           |
|       | 111    |             |                |                  |              |                |                  | 60          | 30             |                  |
|       | 113    |             |                |                  |              |                |                  | 0.008       | 0.033          | -0.025           |
|       | 115    |             |                |                  | 0.000        | 0.006          | -0.006           | 0.000       | 0.067          | -0.067           |
|       | 117    |             |                |                  | 0.000        | 0.006          | -0.006           | 0.000       | 0.083          | -0.083           |
|       | 118    |             |                |                  | 0.020        | 0.006          | 0.014            | 0.008       | 0.033          | -0.033           |
|       | 120    |             |                |                  | 0.000        | 0.018          | -0.018           |             | 0.050          | -0.042           |
|       | 121    | 0.079       | 0.045          | 0.034            | 0.050        | 0.012          | 0.038            | 0.042       | 0.033          | 0.008            |
|       | 122    |             |                |                  | 0.010        | 0.072          | -0.062           | 0.000       | 0.017          | -0.017           |
|       | 123    | 0.125       | 0.117          | 0.008            | 0.110        | 0.060          | 0.050            | 0.142       | 0.017          | 0.125            |
|       | 124    |             |                |                  | 0.000        | 0.169          | -0.169           | 0.000       | 0.017          | -0.017           |
|       | 125    | 0.171       | 0.208          | -0.037           | 0.260        | 0.054          | 0.206            | 0.208       | 0.233          | -0.025           |
|       | 126    |             |                |                  | 0.000        | 0.325          | -0.325           | 0.000       | 0.017          | -0.017           |
|       | 127    | 0.237       | 0.545          | -0.309           | 0.450        | 0.072          | 0.378            | 0.517       | 0.350          | 0.167            |
|       | 128    |             |                |                  | 0.000        | 0.042          | -0.042           |             |                |                  |
|       | 129    | 0.079       | 0.084          | -0.005           | 0.070        | 0.042          | 0.028            | 0.067       | 0.050          | 0.017            |
|       | 130    |             |                |                  | 0.000        | 0.048          | -0.048           |             |                |                  |
|       | 131    | 0.105       | 0.000          | 0.105            | 0.010        | 0.006          | 0.004            | 0.008       | 0.000          | 0.008            |
|       | 132    | 0.007       | 0.000          | 0.007            | 0.010        | 0.054          | -0.044           |             |                |                  |
|       | 133    | 0.118       | 0.000          | 0.118            | 0.000        | 0.006          | -0.006           |             |                |                  |
|       | 134    |             |                |                  | 0.010        | 0.000          | 0.010            |             |                |                  |
|       | 135    | 0.072       | 0.000          | 0.072            |              |                |                  |             |                |                  |
|       | 137    | 0.007       | 0.000          | 0.007            |              |                |                  |             |                |                  |
|       |        |             | Average        | 0.000            |              | Average        | 0.000            |             | Average        | 0.000            |
|       |        |             | Maximum        | 0.295            |              | Maximum        | 0.541            |             | Maximum        | 0.472            |
|       |        |             | 95% Percentile | 0.064            |              | 95% Percentile | 0.11843          |             | 95% Percentile | 0.0979           |
|       |        |             | SD             | 0.0719           |              | SD             | 0.1051           |             | SD             | 0.074            |
